# Supplementary material for: RBD-VLP Vaccines Adjuvanted with Alum or SWE Protect K18-hACE2 Mice against SARS-CoV-2 VOC Challenge
Source: PubMed Central journal article supplement (PMC9429941; doi:10.1128/msphere.00243-22), 2022-08-15
Supplement: msphere.00243-22-s0001.pdf [file msphere.00243-22-s0001.pdf]

| <b>Vaccine</b>           | <b>Composition</b>                                       |
|--------------------------|----------------------------------------------------------|
| <b>β RBD HBsAg+AI</b>    | <b>10μg β RBD J HBsAg + 100μg AIOH</b>                   |
| <b>β/Wu RBD HBsAg+AI</b> | <b>5μg β RBD J HBsAg + 5μg Wu RBD HBsAg + 100μg AIOH</b> |
| <b>β RBD HBsAg + SWE</b> | <b>1.25μg β RBD J (N Tag) HBsAg + SWE</b>                |
| <b>β RBD+SWE</b>         | <b>2.5μg β RBD J (N Tag) + SWE</b>                       |
| <b>mRNA</b>              | <b>3ug Pfizer mRNA</b>                                   |
