# Supplementary material for: RBD-VLP Vaccines Adjuvanted with Alum or SWE Protect K18-hACE2 Mice against SARS-CoV-2 VOC Challenge
Source: PubMed Central journal article supplement (PMC9429941; doi:10.1128/msphere.00243-22), 2022-08-15
Supplement: msphere.00243-22-s0002.pdf [file msphere.00243-22-s0002.pdf]

Vaccine groups

| RBD strain | Prime                                | Summary | Adjusted P value |
|------------|--------------------------------------|---------|------------------|
| Wuhan      | β RBD HBsAg+AI vs β RBD HBsAg+SWE    | ****    | <0.0001          |
| Wuhan      | β RBD HBsAg+AI vs Pfizer mRNA        | ****    | <0.0001          |
| Wuhan      | β/Wu RBD HBsAg+AI vs β RBD HBsAg+SWE | ****    | <0.0001          |
| Wuhan      | β/Wu RBD HBsAg+AI vs Pfizer mRNA     | ****    | <0.0001          |
| Wuhan      | β RBD HBsAg+SWE vs β RBD+SWE         | ****    | <0.0001          |
| Wuhan      | β RBD HBsAg+SWE vs Pfizer            | ****    | <0.0001          |
| Wuhan      | β RBD+SWE vs Pfizer                  | ****    | <0.0001          |
| Wuhan      | <b>Boost 2</b>                       |         |                  |
| Wuhan      | β RBD HBsAg+AI vs β RBD HBsAg+SWE    | ***     | 0.0003           |
| Wuhan      | β RBD HBsAg+AI vs β RBD+SWE          | ****    | <0.0001          |
| Wuhan      | β RBD HBsAg+AI vs Pfizer mRNA        | ***     | 0.0007           |
| Wuhan      | β/Wu RBD HBsAg+AI vs β RBD+SWE       | ****    | <0.0001          |
| Wuhan      | β RBD HBsAg+SWE vs β RBD+SWE         | ****    | <0.0001          |
| Wuhan      | β RBD+SWE vs Pfizer                  | ****    | <0.0001          |

| RBD strain | Prime                                | Summary | Adjusted P value |
|------------|--------------------------------------|---------|------------------|
| Alpha      | β RBD HBsAg+AI vs β RBD HBsAg+SWE    | ****    | <0.0001          |
| Alpha      | β RBD HBsAg+AI vs Pfizer mRNA        | ****    | <0.0001          |
| Alpha      | β/Wu RBD HBsAg+AI vs β RBD HBsAg+SWE | ****    | <0.0001          |
| Alpha      | β/Wu RBD HBsAg+AI vs Pfizer mRNA     | ****    | <0.0001          |
| Alpha      | β RBD HBsAg+SWE vs β RBD+SWE         | ****    | <0.0001          |
| Alpha      | β RBD HBsAg+SWE vs Pfizer            | ****    | <0.0001          |
| Alpha      | β RBD+SWE vs Pfizer                  | ****    | <0.0001          |
| Alpha      | <b>Boost 2</b>                       |         |                  |
| Alpha      | β RBD HBsAg+AI vs β RBD HBsAg+SWE    | ***     | 0.0003           |
| Alpha      | β RBD HBsAg+AI vs β RBD+SWE          | ****    | <0.0001          |
| Alpha      | β RBD HBsAg+AI vs Pfizer mRNA        | ***     | 0.0001           |
| Alpha      | β/Wu RBD HBsAg+AI vs β RBD HBsAg+SWE | **      | 0.0069           |
| Alpha      | β/Wu RBD HBsAg+AI vs β RBD+SWE       | ****    | <0.0001          |
| Alpha      | β/Wu RBD HBsAg+AI vs Pfizer mRNA     | *       | 0.0123           |
| Alpha      | β RBD HBsAg+SWE vs β RBD+SWE         | ****    | <0.0001          |
| Alpha      | β RBD+SWE vs Pfizer mRNA             | ****    | <0.0001          |

| RBD strain | Prime                                | Summary | Adjusted P value |
|------------|--------------------------------------|---------|------------------|
| Beta       | β RBD HBsAg+AI vs β RBD HBsAg+SWE    | ****    | <0.0001          |
| Beta       | β RBD HBsAg+AI vs Pfizer mRNA        | ****    | <0.0001          |
| Beta       | β/Wu RBD HBsAg+AI vs β RBD HBsAg+SWE | ****    | <0.0001          |
| Beta       | β/Wu RBD HBsAg+AI vs Pfizer mRNA     | ****    | <0.0001          |
| Beta       | β RBD HBsAg+SWE vs β RBD+SWE         | ****    | <0.0001          |
| Beta       | β RBD HBsAg+SWE vs Pfizer            | ****    | <0.0001          |
| Beta       | β RBD+SWE vs Pfizer                  | ****    | <0.0001          |
| Beta       | <b>Boost 2</b>                       |         |                  |
| Beta       | β RBD HBsAg+AI vs β RBD HBsAg+SWE    | ***     | 0.0003           |
| Beta       | β RBD HBsAg+AI vs β RBD+SWE          | ****    | <0.0001          |
| Beta       | β RBD HBsAg+AI vs Pfizer mRNA        | **      | 0.0016           |
| Beta       | β/Wu RBD HBsAg+AI vs β RBD HBsAg+SWE | ***     | 0.0005           |
| Beta       | β/Wu RBD HBsAg+AI vs β RBD+SWE       | ****    | <0.0001          |
| Beta       | β/Wu RBD HBsAg+AI vs Pfizer mRNA     | **      | 0.0038           |
| Beta       | β RBD HBsAg+SWE vs β RBD+SWE         | ****    | <0.0001          |
| Beta       | β RBD+SWE vs Pfizer                  | ****    | <0.0001          |

| RBD strain | Prime                                | Summary | Adjusted P value |
|------------|--------------------------------------|---------|------------------|
| Delta      | β RBD HBsAg+AI vs β RBD HBsAg+SWE    | ****    | <0.0001          |
| Delta      | β RBD HBsAg+AI vs Pfizer mRNA        | ****    | <0.0001          |
| Delta      | β/Wu RBD HBsAg+AI vs β RBD HBsAg+SWE | ****    | <0.0001          |
| Delta      | β/Wu RBD HBsAg+AI vs Pfizer mRNA     | ****    | <0.0001          |
| Delta      | β RBD HBsAg+SWE vs β RBD+SWE         | ****    | <0.0001          |
| Delta      | β RBD HBsAg+SWE vs Pfizer mRNA       | ****    | <0.0001          |
| Delta      | β RBD+SWE vs Pfizer mRNA             | ****    | <0.0001          |
| Delta      | <b>Boost 2</b>                       |         |                  |
| Delta      | β RBD HBsAg+AI vs β RBD HBsAg+SWE    | **      | 0.0015           |
| Delta      | β RBD HBsAg+AI vs β RBD+SWE          | ****    | <0.0001          |
| Delta      | β RBD HBsAg+AI vs Pfizer mRNA        | **      | 0.0032           |
| Delta      | β/Wu RBD HBsAg+AI vs β RBD+SWE       | ****    | <0.0001          |
| Delta      | β RBD HBsAg+SWE vs β RBD+SWE         | ****    | <0.0001          |
| Delta      | β RBD+SWE vs Pfizer mRNA             | ****    | <0.0001          |
