# Supplementary material for: RBD-VLP Vaccines Adjuvanted with Alum or SWE Protect K18-hACE2 Mice against SARS-CoV-2 VOC Challenge
Source: PubMed Central journal article supplement (PMC9429941; doi:10.1128/msphere.00243-22), 2022-08-15
Supplement: msphere.00243-22-s0003.pdf [file msphere.00243-22-s0003.pdf]

## Prime

## Boost 2

**A**

**Wuhan**

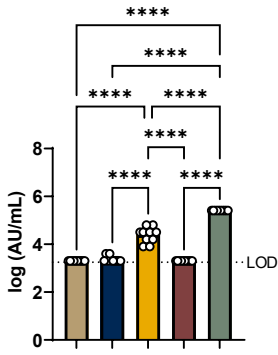

**B**

**Wuhan**

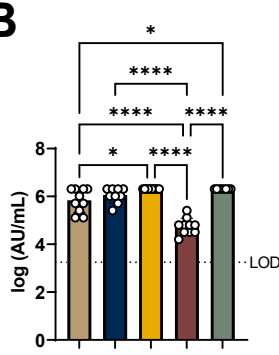

**C**

**Alpha**

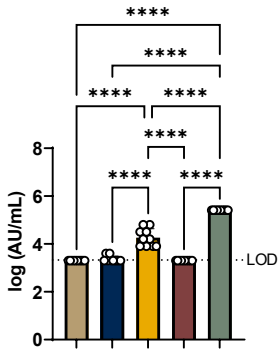

**D**

**Alpha**

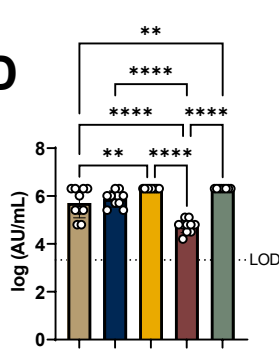

**E**

**Beta**

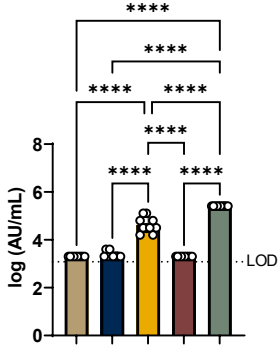

**F**

**Beta**

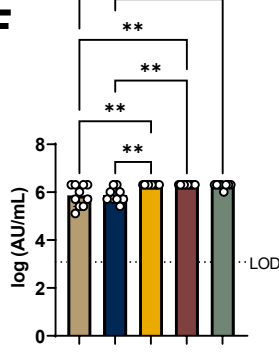

**G**

**Delta**

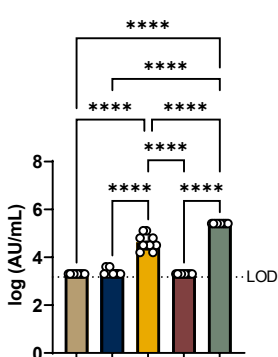

**H**

**Delta**

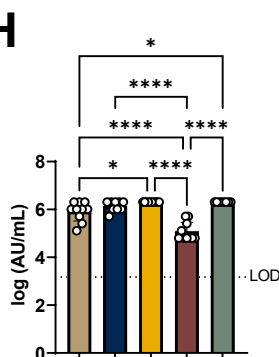

● β RBD HBsAg+AI 
 ● β/Wu RBD HBsAg+AI 
 ● β RBD HBsAg+SWE 
 ● β RBD+SWE 
 ● mRNA
