# Supplementary material for: RBD-VLP Vaccines Adjuvanted with Alum or SWE Protect K18-hACE2 Mice against SARS-CoV-2 VOC Challenge
Source: PubMed Central journal article supplement (PMC9429941; doi:10.1128/msphere.00243-22), 2022-08-15

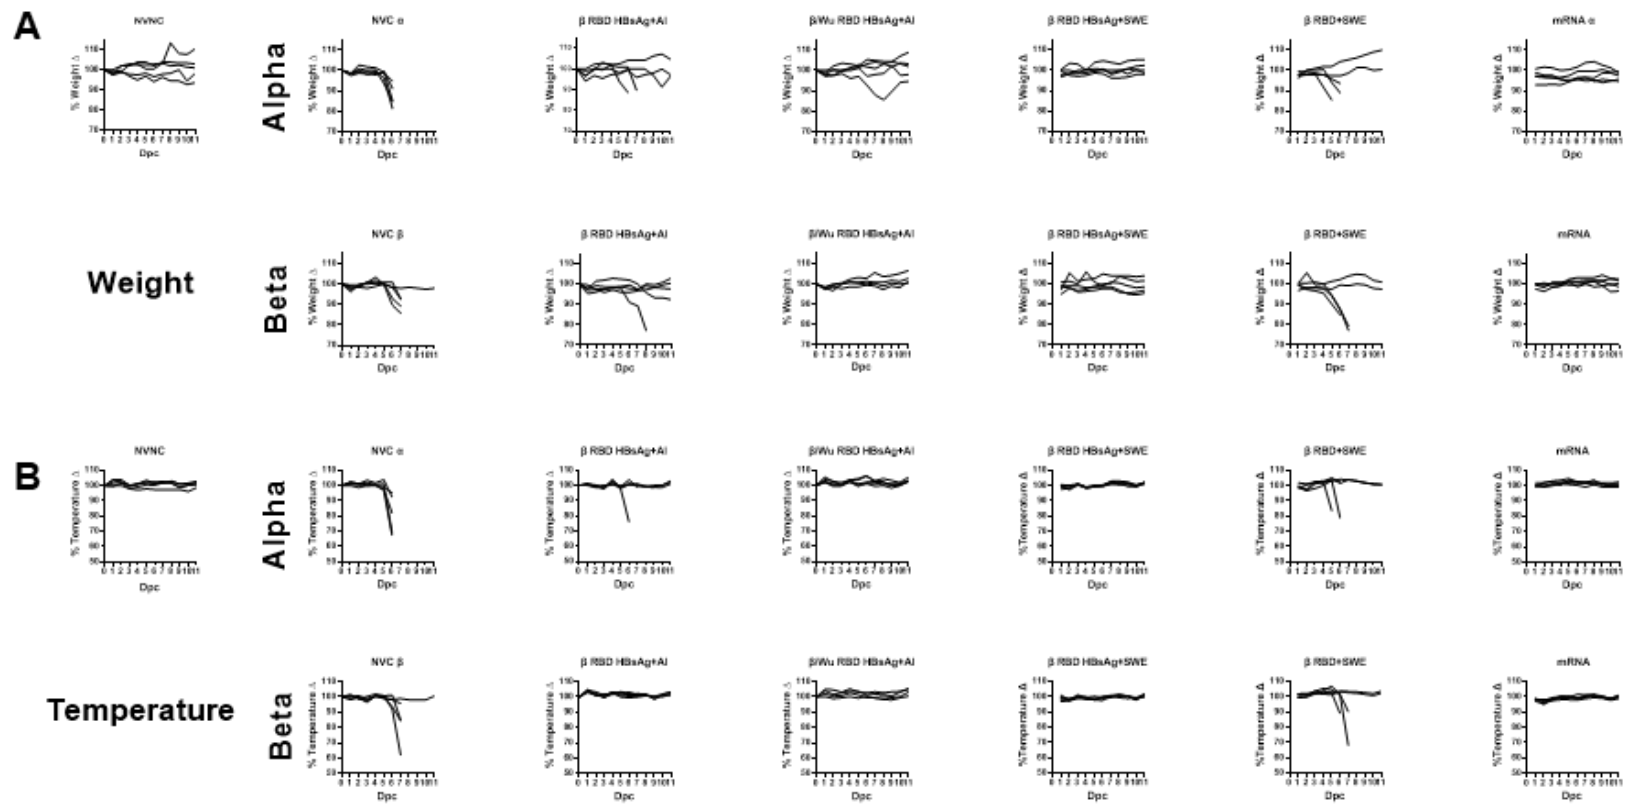

Supplement: msphere.00243-22-s0004.pdf [file msphere.00243-22-s0004.pdf]
